# Supplementary material
Source: Springer Nature journal article supplement (https://www.springermedizin.de/resource/supplementary/12891_2013_1871_MOESM1_ESM.pdf/9508676)
Supplement: MOESM1 [file 9508676]

# Enrolment procedures & exclusions

538 AS patients in Department Records

361 patients invited to participate

177 patients did not meet with study criteria

Other concomitant rheumatic disease, 15  
Sacroileitis were not found on radiographs, 40  
Radiographs of sacroiliac joints were not found, 20  
Unilateral, not graded sacroileitis, 15  
Inflammatory bowel disease, 21  
Psoriasis, 19  
Inflammatory bowel disease and psoriasis, 4  
Wrong diagnosis, 4  
Other severe disease such as malignancy, 9  
Diseased or moved away, 9  
Unable to answer questionnaires, 16  
Medical records were missing, 5

72 patients declined participation

60 patients did not respond to invitation

19 patients showed exclusion criteria

Psoriasis, 7  
Inflammatory bowel disease, 6  
Pregnancy, 3  
Unable to answer questionnaires, 3

210 patients included

Physical examination, questionnaires, blood tests, ECG
